# Supplementary material for: Peatland Ecosystem Processes in the Maritime Antarctic During Warm Climates
Source: PubMed Central journal article supplement (PMC5617846; doi:10.1038/s41598-017-12479-0), 2017-09-27
Supplement: 41598_2017_12479_MOESM1_ESM.pdf [file 41598_2017_12479_MOESM1_ESM.pdf]

# Peatland Ecosystem Processes in the Maritime Antarctic During Warm Climates

Julie Loisel, Zicheng Yu, David W. Beilman, Karl Kaiser, Ivan Parnikoza

## Supplementary Information

**Table S1.** Radiocarbon dating information.

| sample ID | Depth (cm)          | Dated material | <sup>14</sup> C date ± error (yr BP) | Median age <sup>#</sup> (cal. BP) | Lab ID      |
|-----------|---------------------|----------------|--------------------------------------|-----------------------------------|-------------|
| RAS-1-01  | 00-01 <sup>*</sup>  | moss stems     | 1.0379 ± 0.0033 <sup>†</sup>         | 1962 or 1985 AD                   | CAMS-170310 |
| RAS-1-09  | 09-10               | moss branches  | 2270 ± 90                            | 2225                              | CAMS-170228 |
| RAS-1-19  | 19-20               | moss branches  | 2290 ± 120                           | 2250                              | CAMS-170229 |
| RAS-1-29  | 29-30               | moss branches  | 2010 ± 60                            | 1925                              | CAMS-170230 |
| RAS-1-39  | 39-40               | moss stems     | 2540 ± 60                            | 2575                              | CAMS-170231 |
| RAS-1-49  | 49-50 <sup>**</sup> | moss stems     | 2550 ± 45                            | 2750                              | CAMS-170248 |

<sup>\*</sup>δ<sup>13</sup>C = -24.3‰      <sup>\*\*</sup>δ<sup>13</sup>C = -20.0‰      <sup>#</sup>Calibrated using the ShCal13 dataset

<sup>†</sup>Post-bomb date; fraction of modern radiocarbon (F<sup>14</sup>C) is reported.
